# Supplementary material
Source: PubMed Central journal article supplement (PMC7159870)
Supplement: mmc1.pdf [file mmc1.pdf]

# THE LANCET Oncology

## Supplementary appendix

This appendix formed part of the original submission and has been peer reviewed. We post it as supplied by the authors.

Supplement to: The UK Coronavirus Cancer Monitoring Project team. The UK Coronavirus Cancer Monitoring Project: protecting patients with cancer in the era of COVID-19. *Lancet Oncol* 2020; published online April 15. [http://dx.doi.org/10.1016/S1470-2045\(20\)30230-8](http://dx.doi.org/10.1016/S1470-2045(20)30230-8).

## **Appendix**

### **Author list - The UK Coronavirus Monitoring Project team**

Iris Anil, Roland Arnold, Sam Benkwitz-Beford, Simon Branford, Naomi Campton, Jean-Baptiste Cazier, Vinton Cheng, Helen Curley, Jamie D'Costa, Andrew Edmondson, Anshita Goel, Simon Hartley, Daniel J Hughes, Rachel Kerr, Alvin Lee, Lennard YW Lee, Naomi Longworth, Christopher Middleton, Gary Middleton, Piangfan Naksukpaiboon, Anna Olsson-Brown, Claire Palles, Karin Purshouse, Carol Sandys, Archana Sharma-Oates, Shivan Sivakumar, Ashley Smith, Thomas Starkey, Simon Thompson, Csilla Varnai.
